# Supplementary material for: Oral health-related quality of life of Portuguese adults with mild intellectual disabilities
Source: PLOS journal article supplement (doi:10.1371/journal.pone.0193953), 2018-03-21
Supplement: S1 (10.1371/journal.pone.0193953.s001) [file journal.pone.0193953.s001]

## Índices Clínicos COHI; COCNI e COPI

| COHI Values                                                                 | CRITERIA                                                                                                                                                              |
|-----------------------------------------------------------------------------|-----------------------------------------------------------------------------------------------------------------------------------------------------------------------|
| <b>0</b>                                                                    | <b>Having no criteria that had a medical impact:</b>                                                                                                                  |
| No oral health problems                                                     | No mucosal lesion on lips, tongue or jaw                                                                                                                              |
|                                                                             | and Absence of dental plaque (Greene and Vermillion index = 0 for both arches) [35]                                                                                   |
|                                                                             | and Absence of calculus (Greene and Vermillion index = 0 for both arches) [35]                                                                                        |
|                                                                             | and No gingivitis (Loe and Silness index = 0 for both arches) [36]                                                                                                    |
|                                                                             | and No fractured anterior tooth                                                                                                                                       |
|                                                                             | and No missing anterior tooth                                                                                                                                         |
|                                                                             | and No missing posterior tooth                                                                                                                                        |
|                                                                             | and No dental caries                                                                                                                                                  |
|                                                                             | and No infectious disease                                                                                                                                             |
|                                                                             | and No severe orofacial dysmorphology                                                                                                                                 |
|                                                                             | <b>AND having no criteria that had a social impact:</b>                                                                                                               |
|                                                                             | No halitosis                                                                                                                                                          |
|                                                                             | and No drooling                                                                                                                                                       |
|                                                                             | and No anterior tooth with a fractured, unrestored crown                                                                                                              |
| <b>1</b>                                                                    | <b>OR Having no criteria that had a medical impact:</b>                                                                                                               |
| Existence of one or more problems with a low to a moderate impact on health | No mucosal lesion on lips, tongue or jaw                                                                                                                              |
|                                                                             | or Absence of dental plaque (Green and Vermillion index = 0 for both arches) [35]                                                                                     |
|                                                                             | or Absence of calculus (Green and Vermillion index = 0 for both arches) [35]                                                                                          |
|                                                                             | or No gingivitis (Loe and Silness index = 0 for both arches) [36]                                                                                                     |
|                                                                             | or No fractured anterior tooth                                                                                                                                        |
|                                                                             | or No missing anterior tooth                                                                                                                                          |
|                                                                             | or No missing posterior tooth                                                                                                                                         |
|                                                                             | or No dental caries                                                                                                                                                   |
|                                                                             | or No infectious disease                                                                                                                                              |
|                                                                             | or No orofacial dysmorphology                                                                                                                                         |
|                                                                             | <b>AND having at least one criteria that had a social impact:</b>                                                                                                     |
|                                                                             | Presence of halitosis                                                                                                                                                 |
|                                                                             | or Presence of drooling                                                                                                                                               |
|                                                                             | or At least one anterior tooth with a fractured unrestored crown                                                                                                      |
|                                                                             | <b>Having at least one criterion that had a medical impact</b>                                                                                                        |
|                                                                             | At least one mucosal lesion on lips, tongue or jaw                                                                                                                    |
|                                                                             | or Dental plaque (Greene and Vermillion index >0, on a group of teeth or all the teeth of at least one arch) [35]                                                     |
|                                                                             | or Calculus (Greene and Vermillion index >0, on a group of teeth or all the teeth of at least one arch) [35]                                                          |
|                                                                             | or Localized gingivitis (Loe and Silness index >0 on a group of teeth or at least one arch) [36]                                                                      |
|                                                                             | or At least one anterior tooth with a fractured, unrestored crown                                                                                                     |
|                                                                             | or One limited anterior edentulous segment (1 or 2 anterior teeth)                                                                                                    |
|                                                                             | or At least one minor posterior edentulous segment (missing all molars and premolars on 1 or 2 half-arches with at least one residual inter-arch dental contact)      |
|                                                                             | or At least one incipient carious lesion, but no developed carious lesion (stage 1 or 2 according to the Eckstrand classification for carious lesions) [37]           |
|                                                                             | or Presence of a simple orofacial dysmorphology                                                                                                                       |
|                                                                             | <b>... regardless of the criteria that had a social impact</b>                                                                                                        |
| <b>2</b>                                                                    | <b>Having at least one criteria that had an important medical impact</b>                                                                                              |
| Existence of one or more problems with important to severe impact on health | Generalized gingivitis (Loe and Silness index >0 for both arches) [35]                                                                                                |
|                                                                             | or Missing at least 3 anterior teeth                                                                                                                                  |
|                                                                             | or At least one major posterior edentulous segment (missing all molar and premolars on at least 2 half-arches, without any residual inter-arch dental contact)        |
|                                                                             | or At least one developed carious lesion (stage 3 or 4 according to the Eckstrand classification for carious lesions) either on a deciduous or a permanent tooth [37] |
|                                                                             | or At least one infected lesion (presence of an abscess, or a tooth with pulpal exposure, or a fistula)                                                               |
|                                                                             | or Presence of complex orofacial dysmorphology                                                                                                                        |
|                                                                             | <b>... regardless of the criteria that had a social impact</b>                                                                                                        |
| <b>Undetermined</b>                                                         | At least one undetermined criteria that had a medical impact and regardless of the criteria that had a social impact.                                                 |
| Others conditions by elimination                                            | or Having no criteria that had a medical impact but having at least one undetermined criteria that had a social impact.                                               |

doi:10.1371/journal.pone.0002564.t002

| COCNI Values                                    | Suspected health conditions                                   | CRITERIA                                                                                                                                                                                                                                                                                                                                                                                                                                                                                                                                                                                |
|-------------------------------------------------|---------------------------------------------------------------|-----------------------------------------------------------------------------------------------------------------------------------------------------------------------------------------------------------------------------------------------------------------------------------------------------------------------------------------------------------------------------------------------------------------------------------------------------------------------------------------------------------------------------------------------------------------------------------------|
| <b>3</b><br>Urgent need for care or examination | Marker of local infectious disease                            | <ul style="list-style-type: none"> <li>During the last three months the child expressed discomfort or pain in his/her mouth and consecutively he/she had no dental visit.</li> <li>or</li> <li>At least one mucosal lesion on lips, tongue or jaw</li> <li>or</li> <li>At least one infected lesion (presence of an abscess, or a tooth with pulp exposure cavity, or a fistula)</li> </ul> AND absence of any systemic disease* requiring specific oral health monitoring.                                                                                                             |
|                                                 | Marker of focal infectious disease                            | <ul style="list-style-type: none"> <li>During the last three months the child expressed discomfort or pain in his/her mouth and consecutively he/she had no dental visit.</li> <li>or</li> <li>Presence of at least one mucosal lesion on lips, tongue or jaw</li> <li>or</li> <li>At least one infected lesion (presence of an abscess, or a tooth with a pulp exposure, or a fistula)</li> <li>or</li> <li>Presence of generalized gingivitis (Loe and Silness index &gt;0 for both arches)</li> </ul> AND Existence of a systemic disease requiring specific oral health monitoring* |
|                                                 | Marker of traumatic lesions                                   | <ul style="list-style-type: none"> <li>During the last three months the child expressed discomfort or pain in his/her mouth and consecutively he/she had no dental visit.</li> <li>or</li> <li>Presence of at least one mucosal lesion on lips, tongue or jaw</li> </ul>                                                                                                                                                                                                                                                                                                                |
|                                                 | Marker of oral disease with functional or social consequences | During the last three months the child expressed discomfort or pain with his/her mouth and consecutively he/she had no dental visit.                                                                                                                                                                                                                                                                                                                                                                                                                                                    |
| <b>2</b><br>Need for care or examination        | Marker of local infectious disease                            | <ul style="list-style-type: none"> <li>Presence of calculus</li> <li>or</li> <li>Presence of gingivitis</li> <li>or</li> <li>Presence of at least one anterior tooth with a fractured, unrestored crown</li> <li>or</li> <li>Presence of at least one developed carious lesion.</li> </ul> AND Absence of a systemic disease* requiring specific oral health monitoring                                                                                                                                                                                                                 |
|                                                 | Marker of focal infectious disease                            | <ul style="list-style-type: none"> <li>Presence of calculus.</li> <li>or</li> <li>Presence of a localized gingivitis</li> <li>or</li> <li>Presence of at least one anterior tooth with a fractured, unrestored crown</li> <li>or</li> <li>Presence of at least one developed carious lesion.</li> </ul> AND Existence of a systemic disease* requiring specific oral health monitoring                                                                                                                                                                                                  |
|                                                 | Marker of traumatic lesions                                   | Presence of at least one anterior tooth with a fractured, unrestored crown                                                                                                                                                                                                                                                                                                                                                                                                                                                                                                              |
|                                                 | Marker of oral disease with functional or social consequences | No dental visit over the last 12 months                                                                                                                                                                                                                                                                                                                                                                                                                                                                                                                                                 |
| <b>1</b><br>Need for examination                | Marker of local infectious disease                            | <ul style="list-style-type: none"> <li>No dental visit over the last 12 months</li> <li>or</li> <li>Presence of dental plaque</li> <li>or</li> <li>Presence of at least one incipient carious lesion.</li> </ul> AND Absence of a systemic disease* requiring specific oral health monitoring                                                                                                                                                                                                                                                                                           |
|                                                 | Marker of focal infectious disease                            | <ul style="list-style-type: none"> <li>No dental visit over the last 12 months</li> <li>or</li> <li>Presence of dental plaque</li> <li>or</li> <li>Presence of at least one incipient carious lesion.</li> </ul> AND Existence of a systemic disease* requiring specific oral health monitoring                                                                                                                                                                                                                                                                                         |
|                                                 | Marker of traumatic lesions                                   | No dental visit over the last 12 months                                                                                                                                                                                                                                                                                                                                                                                                                                                                                                                                                 |
|                                                 | Marker of oral disease with functional or social consequences | <ul style="list-style-type: none"> <li>No dental visit over the last 12 months</li> <li>or</li> <li>Presence of an anterior edentulous segment from 1 to 6 teeth on at least one arch.</li> <li>or</li> <li>Presence of a posterior edentulous segment for children up to 13 years old)</li> <li>or</li> <li>Presence of untreated severe orofacial dysmorphism</li> </ul>                                                                                                                                                                                                              |
| <b>0</b><br>No need for care nor examination    |                                                               | Other conditions by elimination                                                                                                                                                                                                                                                                                                                                                                                                                                                                                                                                                         |

\*Epilepsy, congenital cardiac disease, bronchopneumopathy (including asthma), internal prosthesis, immunodeficiency and hematological disease, or diabetes.  
doi:10.1371/journal.pone.0002564.t003

| COPi Values                                                                 | CRITERIA                                                                 |
|-----------------------------------------------------------------------------|--------------------------------------------------------------------------|
| <b>1</b>                                                                    | Existence of systemic disease requiring specific oral health monitoring* |
| Existence of at least one preventive or dental health education action need | or Presence of dental plaque                                             |
|                                                                             | or Lack of autonomy for feeding                                          |
|                                                                             | or Being fed by tube or parenteral nutrition                             |
|                                                                             | or Restriction to puréed foods                                           |
|                                                                             | or Eating hyper-calorific food complements or drinking sweetened drinks  |
|                                                                             | or Coughing regularly during meals                                       |
|                                                                             | or Presence of halitosis                                                 |
|                                                                             | or Having difficulties communicating pain                                |
|                                                                             | or Drooling                                                              |
|                                                                             | or Being uncooperative during oral examination [38]                      |
| <b>0</b>                                                                    |                                                                          |
| No need for either preventive health action or dental education             | Other conditions, by elimination                                         |

\*as defined in the descriptive results section.  
doi:10.1371/journal.pone.0002564.t004
